# Supplementary material
Source: MDPI journal article supplement (https://www.mdpi.com/2073-4395/13/4/965)
Supplement: s1 [file s1 › agronomy-2286957-supplementary.pdf]

# Supplementary Material

Jesús Fernández-Habas <sup>1</sup>, Daniel Real <sup>2</sup>, Tom Vanwalleghem <sup>3</sup> and Pilar Fernández-Rebollo <sup>1,\*</sup>

<sup>1</sup> Department of Forest Engineering, University of Cordoba, Spain

<sup>2</sup> Department of Primary Industries and Regional Development (DPIRD), Perth, WA 6151, Australia

<sup>3</sup> Department of Agronomy, Hydraulic Engineering Area, University of Cordoba, Spain

\* Correspondence: ir1ferep@uco.es

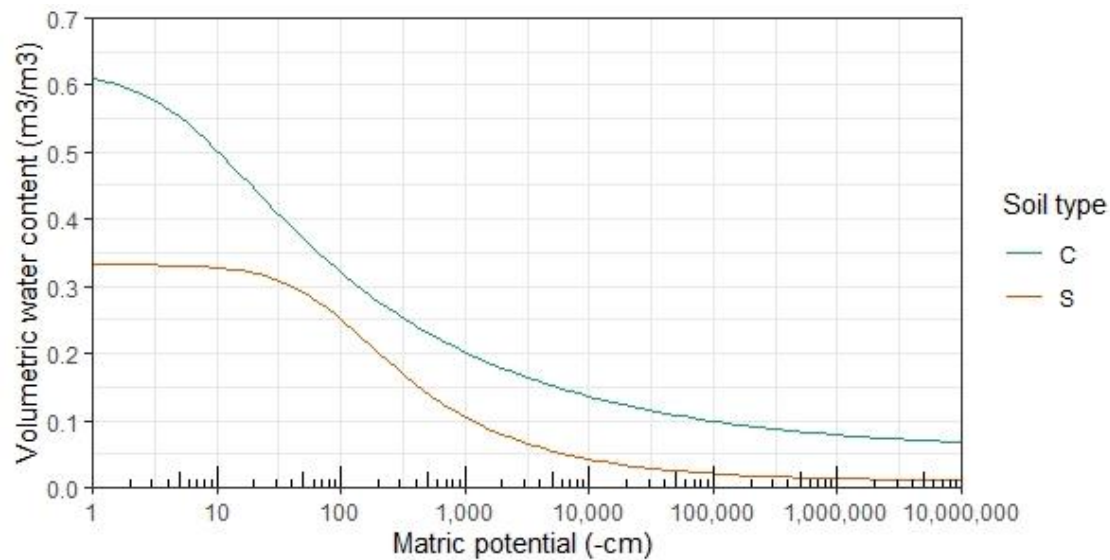

**Figure S1.** Water retention curves for loamy sand (S) and clay (C) soils adjusted to Van Genuchten equation. Van Genuchten parameters for S soil:  $\theta_s = 0.33$ ,  $\theta_r = 0.01$ ,  $\alpha = 0.013$ ,  $n = 1.47$ . Van Genuchten parameters for C soil:  $\theta_s = 0.62$ ,  $\theta_r = 0.05$ ,  $\alpha = 0.186$ ,  $n = 1.26$

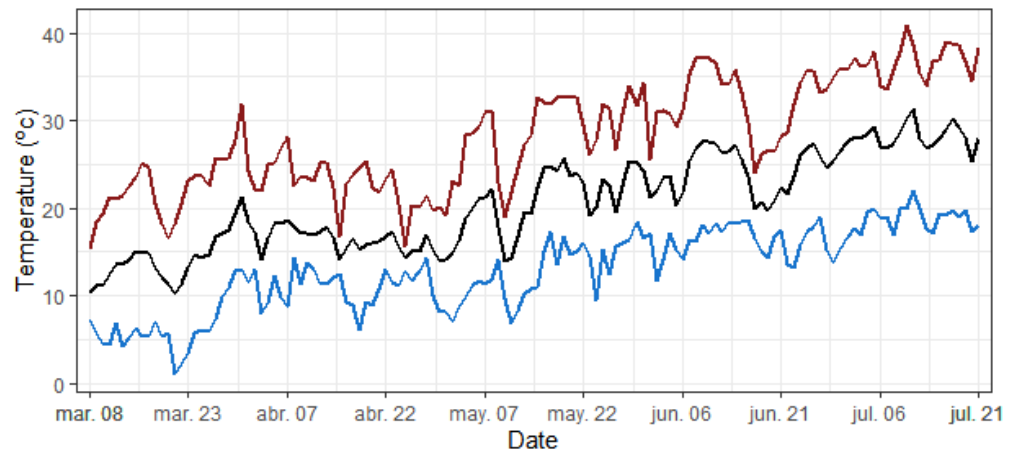

**Figure S2.** Daily mean (black), maximum (red) and minimum (blue) temperatures during the experiment.

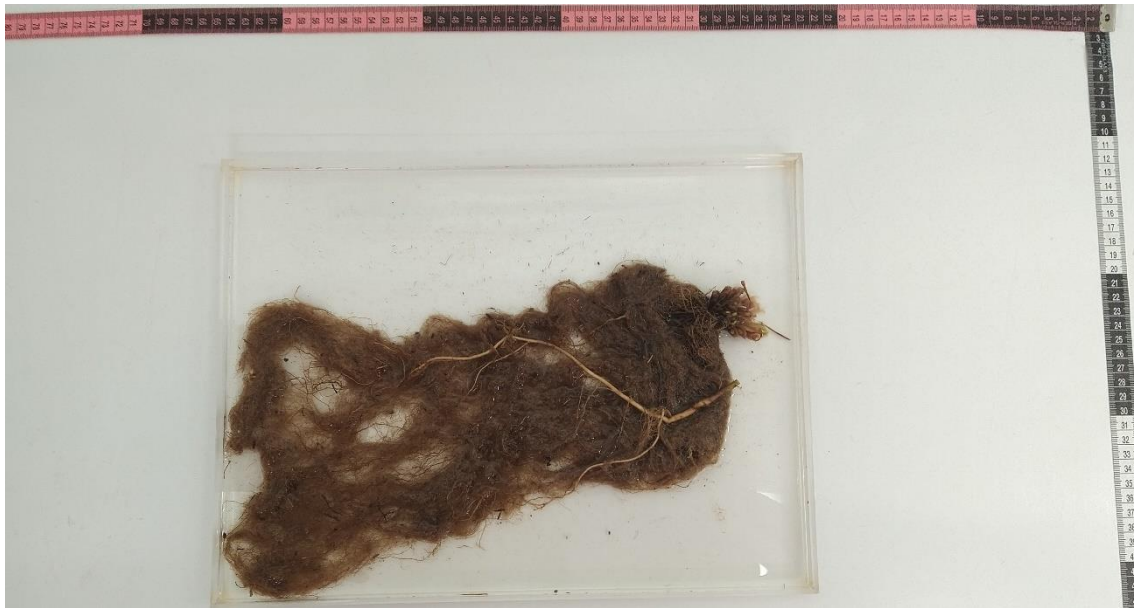

**Figure S3.** Example of roots of LANZA® and *L. multiflorum* grown in the same pot (Competition).

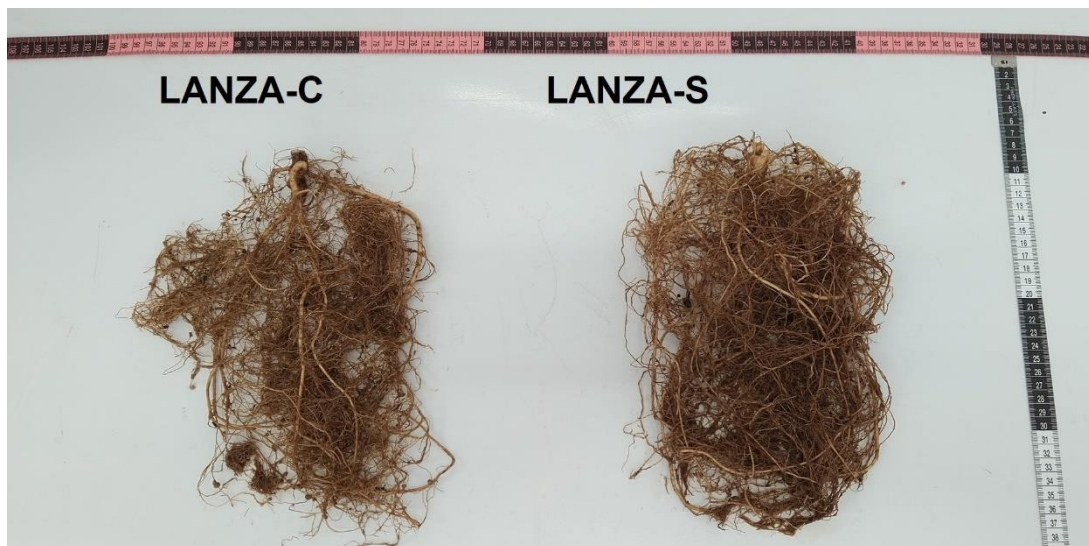

**Figure S4.** Example of roots after separation from soil in two plants of LANZA® grown in clay soil (left) and grown in loamy sand soil (right).

**Table S1.** Cumulative link mixed model fitted for phenology analysis.

| Term               | LR Chisq | d.f. | p      |
|--------------------|----------|------|--------|
| Competition (Comp) | 45.89    | 1    | <0.01  |
| Soil type (Soil)   | 15.15    | 1    | <0.001 |
| Date               | 595.39   | 18   | <0.001 |
| Comp x Soil        | 3.67     | 1    | 0.055  |
| Comp x Date        | 124.93   | 18   | <0.001 |
| Soil x Date        | 26.06    | 18   | 0.099  |

d.f. = degrees of freedom, LR Chisq = likelihood ratio chi square. Level of significance  $p = 0.05$ .

**Table S2.** Summary results of the two-way ANOVA evaluating the effects of Competition, soil type and their interaction on shoot mass production and leaf to stem ratio of LANZA®.

| Variable             | Source of variation | d.f. | SS                  | F      | p                |
|----------------------|---------------------|------|---------------------|--------|------------------|
| Phytovolume 12 May   | Competition (Comp)  | 1    | 2.4x10 <sup>8</sup> | 44.04  | <b>&lt;0.001</b> |
|                      | Soil type (Soil)    | 1    | 4.8x10 <sup>7</sup> | 7.71   | <b>&lt;0.05</b>  |
|                      | Comp x Soil         | 1    | 8.7x10 <sup>6</sup> | 1.39   | 0.253            |
|                      | Error               | 20   | 1.2x10 <sup>8</sup> |        |                  |
| Phytovolume 21 July* | Competition (Comp)  | 1    | 5.83                | 86.04  | <b>&lt;0.001</b> |
|                      | Soil type (Soil)    | 1    | 0.18                | 2.677  | 0.117            |
|                      | Comp x Soil         | 1    | 0.06                | 0.910  | 0.351            |
|                      | Error               | 20   | 1.36                |        |                  |
| Shoot dry mass       | Competition (Comp)  | 1    | 4093.0              | 137.56 | <b>&lt;0.001</b> |
|                      | Soil type (Soil)    | 1    | 109.24              | 3.97   | 0.060            |
|                      | Comp x Soil         | 1    | 13.68               | 0.50   | 0.489            |
|                      | Error               | 20   | 550.09              |        |                  |
| Leaf:Stem ratio      | Competition (Comp)  | 1    | 0.23                | 14.46  | <b>&lt;0.01</b>  |
|                      | Soil type (Soil)    | 1    | 0.05                | 3.20   | 0.089            |
|                      | Comp x Soil         | 1    | 0.06                | 3.58   | 0.073            |
|                      | Error               | 20   | 0.32                |        |                  |
| SLA                  | Competition (Comp)  | 1    | 1107.85             | 1.18   | 0.291            |
|                      | Soil type (Soil)    | 1    | 117.15              | 0.12   | 0.728            |
|                      | Comp x Soil         | 1    | 73.36               | 0.08   | 0.783            |
|                      | Error               | 20   | 18806.89            |        |                  |
| Mean leaf area       | Competition (Comp)  | 1    | 5.98                | 9.53   | <b>&lt;0.01</b>  |
|                      | Soil type (Soil)    | 1    | 0.14                | 0.22   | 0.641            |
|                      | Comp x Soil         | 1    | 1.09                | 1.74   | 0.202            |
|                      | Error               | 20   | 12.56               |        |                  |
| Thick roots*         | Competition (Comp)  | 1    | 38.65               | 91.22  | <b>&lt;0.001</b> |
|                      | Soil type (Soil)    | 1    | 1.12                | 2.65   | 0.119            |
|                      | Comp x Soil         | 1    | 0.71                | 1.68   | 0.210            |
|                      | Error               | 20   | 8.47                |        |                  |

d.f. = degrees of freedom, SS= sum of squares, MS= Mean of squares. Level of significance  $p = 0.05$ . \* log-transformed variables.

**Table S3.** Summary results of the two-way ANOVA evaluating the effect of soil type and Competition on net photosynthesis per area ( $A_{area}$ ), stomatal conductance per area ( $g_{Sarea}$ ), water use efficiency (WUE), specific leaf area (SLA) and mean leaf area of LANZA measured at the end of the experiment

| Variable           | Source of variation | d.f. | SS     | F     | <i>p</i>         |
|--------------------|---------------------|------|--------|-------|------------------|
| A <sub>area</sub>  | Competition (Comp)  | 1    | 173.44 | 14.81 | <b>0.001</b>     |
|                    | Soil type (Soil)    | 1    | 7.79   | 0.67  | 0.424            |
|                    | Comp x Soil         | 1    | 50.77  | 4.34  | <b>0.050</b>     |
|                    | Error               | 20   | 234.19 |       |                  |
| g <sub>Sarea</sub> | Competition (Comp)  | 1    | 0.08   | 29.84 | <b>&lt;0.001</b> |
|                    | Soil type (Soil)    | 1    | 0.01   | 2.00  | 0.173            |
|                    | Comp x Soil         | 1    | 0.01   | 5.43  | <b>&lt;0.050</b> |
|                    | Error               | 20   | 0.05   |       |                  |
| WUE*               | Competition (Comp)  | 1    | 0.04   | 18.91 | <b>&lt;0.001</b> |
|                    | Soil type (Soil)    | 1    | 0.00   | 1.74  | 0.202            |
|                    | Comp x Soil         | 1    | 0.00   | 0.39  | 0.540            |
|                    | Error               | 20   | 0.05   |       |                  |
| RWC                | Competition (Comp)  | 1    | 3.43   | 0.67  | 0.423            |
|                    | Soil type (Soil)    | 1    | 2.20   | 0.43  | 0.520            |
|                    | Comp x Soil         | 1    | 9.31   | 1.81  | 0.193            |
|                    | Error               | 20   | 102.57 |       |                  |

d.f. = degrees of freedom, SS= sum of squares. Level of significance *p* = 0.05. \* log-transformed variables.

**Table S4.** Summary results of the one-way ANOVA evaluating the effect of soil type on thin roots, thick roots and thin roots proportion of LANZA®.

| Variable              | Source of variation | d.f. | SS    | F    | <i>p</i>        |
|-----------------------|---------------------|------|-------|------|-----------------|
| Thin roots dry mass   | Soil type           | 1    | 48.26 | 5.57 | <b>&lt;0.05</b> |
|                       | Error               | 10   | 86.58 |      |                 |
| Thick roots dry mass  | Soil type           | 1    | 0.13  | 0.02 | 0.884           |
|                       | Error               | 10   | 56.95 |      |                 |
| Thin roots proportion | Soil type           | 1    | 0.05  | 8.78 | <b>&lt;0.05</b> |
|                       | Error               | 10   | 0.06  |      |                 |

d.f. = degrees of freedom, SS= sum of squares. Level of significance *p* = 0.05.

**Table S5.** Summary results of the two-way ANOVA evaluating the effect of soil type and Competition on leaf content of macronutrients and C N<sup>-1</sup> and N P<sup>-1</sup> ratios.

| Variable | Source of variation | d.f. | SS | F | <i>p</i> |
|----------|---------------------|------|----|---|----------|
|----------|---------------------|------|----|---|----------|

|                   |                    |    |         |        |                  |
|-------------------|--------------------|----|---------|--------|------------------|
| N                 | Competition (Comp) | 1  | 1.63    | 7.44   | <b>&lt;0.05</b>  |
|                   | Soil type (Soil)   | 1  | 0.38    | 1.75   | 0.202            |
|                   | Comp x Soil        | 1  | 0.02    | 0.09   | 0.077            |
|                   | Error              | 19 | 4.16    |        |                  |
| P*                | Competition (Comp) | 1  | 0.009   | 0.430  | 0.519            |
|                   | Soil type (Soil)   | 1  | 1.301   | 66.197 | <b>&lt;0.001</b> |
|                   | Comp x Soil        | 1  | 0.061   | 3.104  | 0.093            |
|                   | Error              | 20 | 0.393   |        |                  |
| C N <sup>-1</sup> | Competition (Comp) | 1  | 61.635  | 8.536  | <b>&lt;0.01</b>  |
|                   | Soil type (Soil)   | 1  | 11.014  | 1.525  | 0.232            |
|                   | Comp x Soil        | 1  | 0.008   | 0.001  | 0.974            |
|                   | Error              | 19 | 137.199 |        |                  |
| N P <sup>-1</sup> | Competition (Comp) | 1  | 41.65   | 2.071  | 0.166            |
|                   | Soil type (Soil)   | 1  | 1307.58 | 65.033 | <b>&lt;0.001</b> |
|                   | Comp x Soil        | 1  | 8.77    | 0.436  | 0.517            |
|                   | Error              | 19 | 382.02  |        |                  |
| K                 | Competition (Comp) | 1  | 0.228   | 1.245  | 0.278            |
|                   | Soil type (Soil)   | 1  | 0.462   | 2.528  | 0.128            |
|                   | Comp x Soil        | 1  | 0.371   | 2.029  | 0.170            |
|                   | Error              | 20 | 3.659   |        |                  |
| Ca                | Competition (Comp) | 1  | 0.0177  | 0.162  | 0.691            |
|                   | Soil type (Soil)   | 1  | 0.0096  | 0.087  | 0.770            |
|                   | Comp x Soil        | 1  | 0.0003  | 0.003  | 0.959            |
|                   | Error              | 20 | 2.1856  |        |                  |
| Mg**              | Competition (Comp) | 1  | 0.017   | 0.358  | 0.557            |
|                   | Soil type (Soil)   | 1  | 0.075   | 1.609  | 0.220            |
|                   | Comp x Soil        | 1  | 0.512   | 11.062 | <b>&lt;0.01</b>  |
|                   | Error              | 19 | 0.880   |        |                  |
| S                 | Competition (Comp) | 1  | 0.0180  | 18.935 | <b>&lt;0.001</b> |
|                   | Soil type (Soil)   | 1  | 0.005   | 4.979  | <b>&lt;0.05</b>  |
|                   | Comp x Soil        | 1  | 0.0001  | 0.109  | 0.745            |
|                   | Error              | 19 | 0.0181  |        |                  |

d.f. = degrees of freedom, SS= sum of squares. Level of significance  $p = 0.05$ . \* log-transformed variables, \*\*power-transformed variables.
